# Supplementary material
Source: PubMed Central journal article supplement (PMC2562635)
Supplement: NIHMS52776-supplement-supplement_1.pdf [file NIHMS52776-supplement-supplement_1.pdf]

## Supplemental Fig 1.

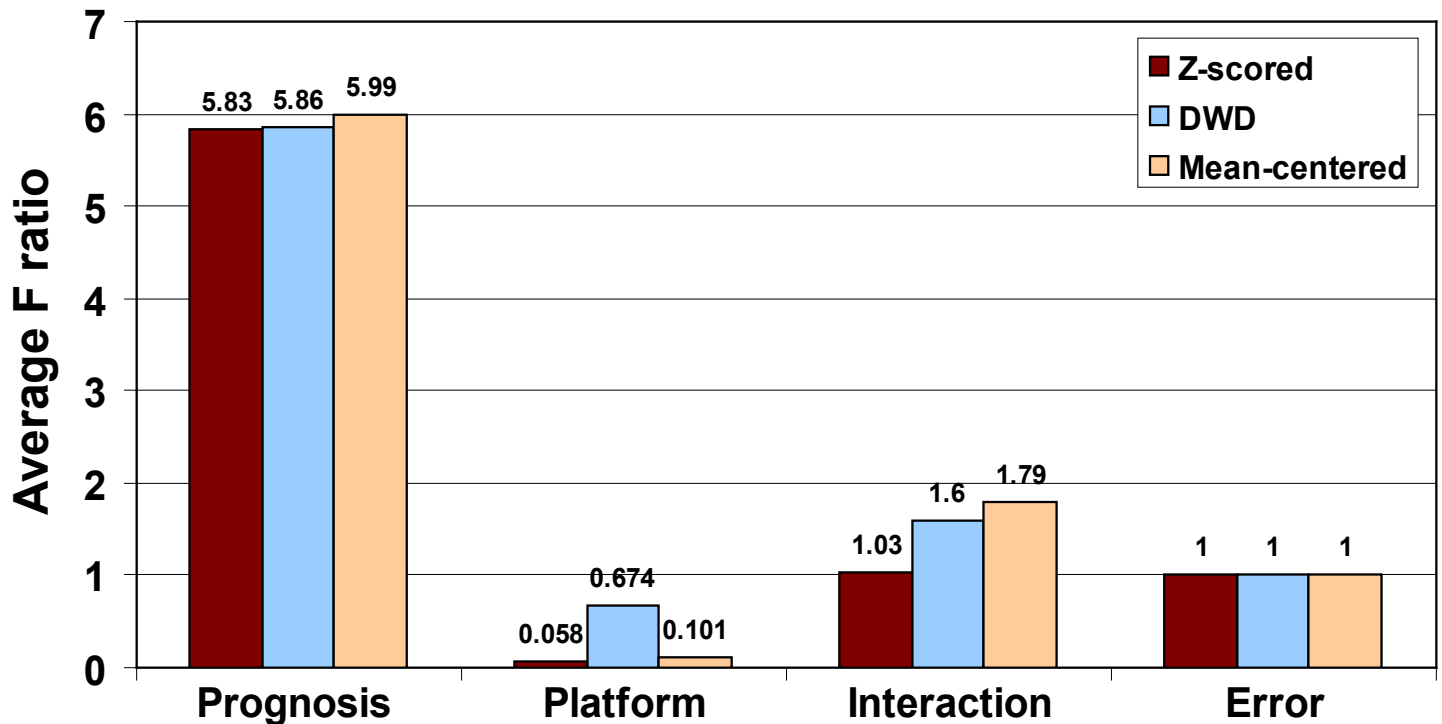

**Supplemental Fig 1. Comparison of three bias removing methods.** The data sets of 42 neuroblastoma samples from cDNA and Affymetrix platforms were combined after the normalization and using one of bias removing methods (z-score standardization, distance weighted discrimination (DWD) [1], and mean-centered method) to remove the effect of platform. DWD was performed using software available at <https://genome.unc.edu/pubsup/dwd>. The sources of variation from the ANOVA analysis showed that all these methods worked well with z-score standardization method showed better than other two methods because of lower interaction and platform effect.

[1] M. Benito, J. Parker, Q. Du, J. Wu, D. Xiang, C.M. Perou, and J.S. Marron, Adjustment of systematic microarray data biases. *Bioinformatics* 20 (2004) 105-14.

## Supplemental Fig 2.

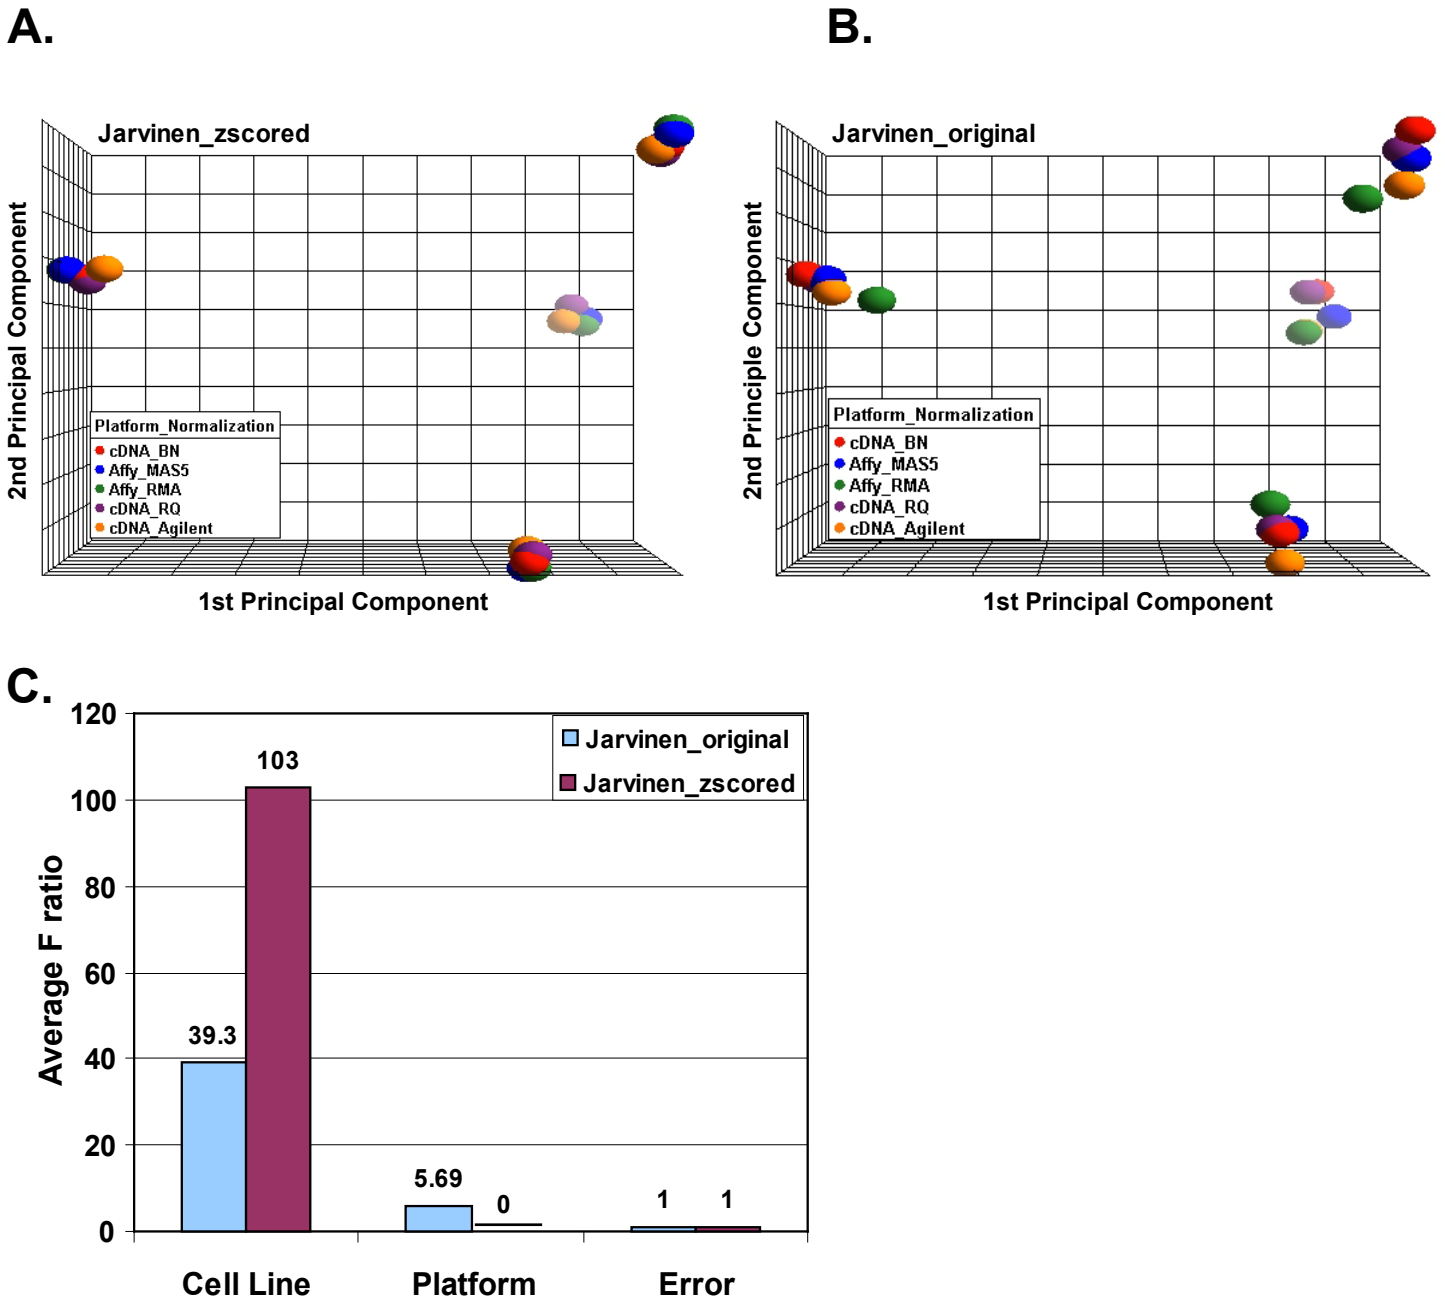

### Supplemental Fig 2. Validation of the integrative method in a breast cancer data set.

A published breast cancer dataset [2] contains four breast cancer cell lines on three different microarray platforms with different normalization methods, there are total 20 combinations of cell line type, platform and normalization method. The labels are as follows: cDNA\_BN, custom-printed cDNA platform and data filtered with Bayesian networks and normalized with Lowess; cDNA\_RQ, custom-printed cDNA platform and data filtered with ratio quality and normalized with ratio statistics; cDNA\_Agilent, Agilent cDNA platform and Agilent normalization; Affy\_MAS5, Affymetrix U95-Av2 platform and MAS5 normalization; Affy\_RMA, Affymetrix U95-Av2 platform and RMA normalization. The Unigene ID was used as a common identifier and probes with the same Unigene ID were averaged [2]. **A.** Loading plot of top three principal components of data processed with z-score standardization. **B.** Loading plot of top three principal components of data without z-score standardization. **C.** Sources of variation in two-way ANOVA analysis. The data processed with z-score standardization result in lower platform effect and higher cell line difference.

[2] A.K. Jarvinen, S. Hautaniemi, H. Edgren, P. Auvinen, J. Saarela, O.P. Kallioniemi, and O. Monni, Are data from different gene expression microarray platforms comparable? *Genomics* 83 (2004) 1164-8.

## Supplemental Fig 3.

A.

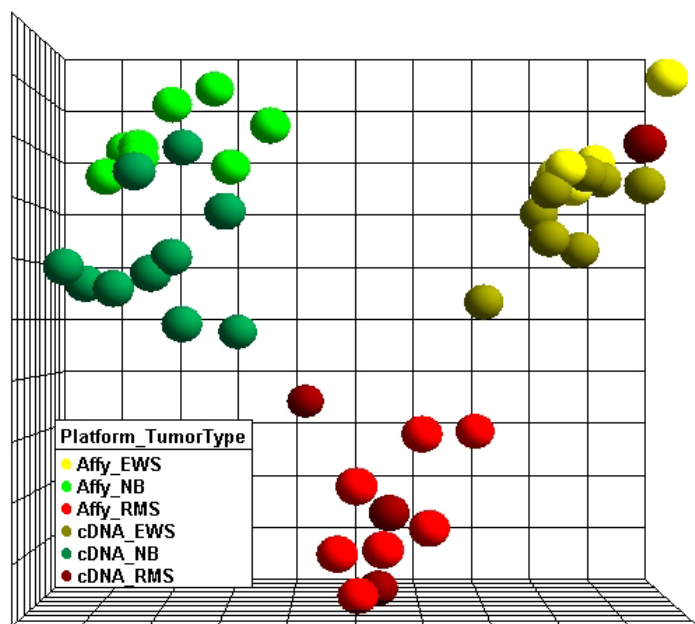

B.

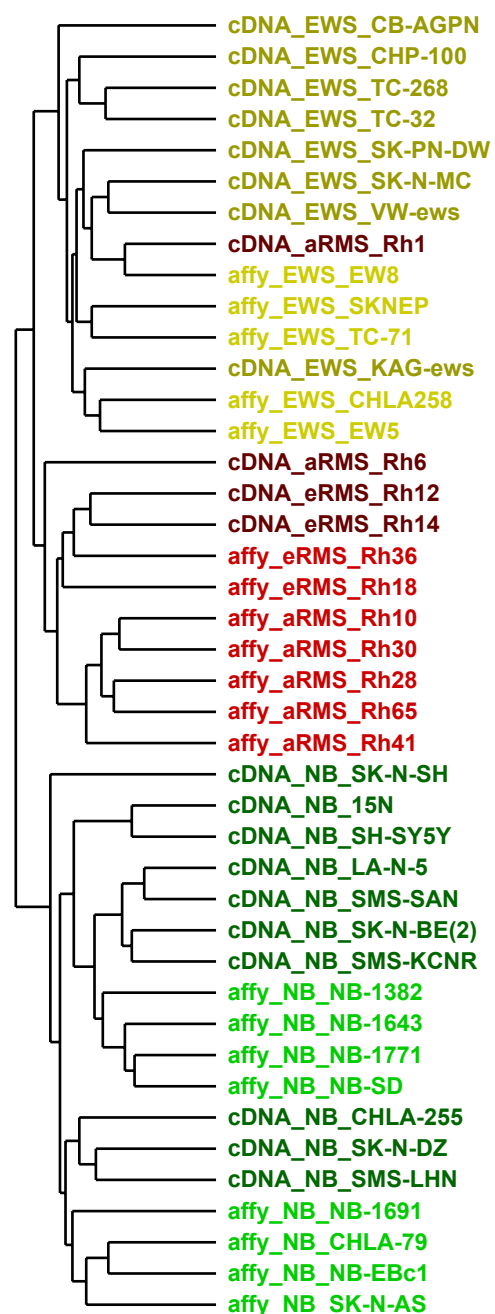

C.

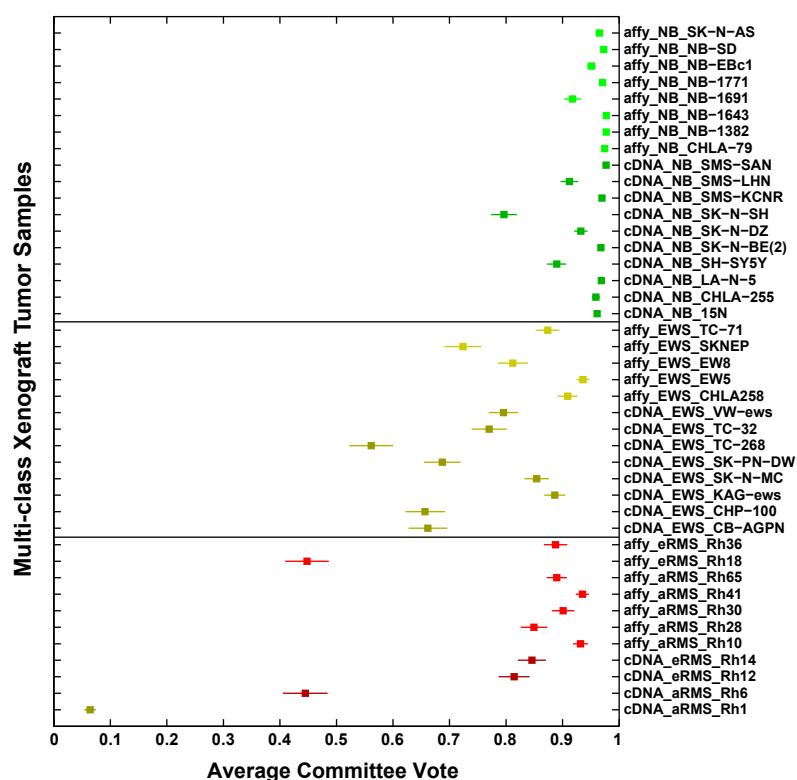

**Supplemental Fig 3. Validation of the integrative method in preclinical pediatric xenograft datasets.** Datasets of total 42 experiments of preclinical pediatric xenograft samples, with 22 experiments on custom cDNA array [3] and 20 experiments on Affymetrix human U133plus2 array platform [4] consist of three pediatric cancer types: Neuroblastoma (NB), Rhabdomyosarcoma (RMS) and Ewing's sarcoma (EWS) (Supplemental Table 4). The cDNA expression ratio between test RNA and reference RNA on each microarray were normalized using a pin-based normalization method. For Affymetrix genechip, .CEL files were exported from Affymetrix GCOS software and normalized by GC-RMA in R [5]. The Unigene ID was used as a common identifier between two platforms and probes with the same Unigene ID were averaged; a total of 11847 Unigenes were common to both platforms and used for analysis. The data from each platform was z-score standardized and then combined for analysis. The sample labels are shown as follows: platform-cancer type-sample name. **A.** Loading plot of top three principal components of the 42 experiments using all 11847 Unigenes demonstrates the separation of three types of cancers except two samples. Platform effect is not seen after standardization. **B.** Hierarchical clustering analysis using all 11847 Unigenes showed the experiments are clustering according to cancer types except cDNA\_aRMS\_Rh1. Rh1 was initially diagnosed as embryonal rhabdomyosarcoma, however review by other has reclassified it as primitive neuroectoderma tumor, which is a member of Ewing's family of tumors [6]. **C.** Classification of the samples from ANN analysis using the leave-one-out strategy. A sample is classified to a cancer category according to its highest committee vote (average of all ANN outputs). Plotted is its committee vote for each sample. The perfectly classified sample would be plotted with a vote = 1. Different cancer categories were displayed in color as red for RMS, yellow for EWS and green for NB. cDNA\_aRMS\_Rh1 was labeled in yellow due to misclassification. See Supplemental Table 3 for ANN diagnosis and the committee votes.

[3] C.C. Whiteford, S. Bilke, B.T. Greer, Q. Chen, T.A. Braunschweig, N. Cenacchi, J.S. Wei, M.A. Smith, P. Houghton, C. Morton, C.P. Reynolds, R. Lock, R. Gorlick, C. Khanna, C.J. Thiele, M. Takikita, D. Catchpoole, S.M. Hewitt, and J. Khan, Credentialing preclinical pediatric xenograft models using gene expression and tissue microarray analysis. *Cancer Res* 67 (2007) 32-40.

[4] G. Neale, X. Su, C.L. Morton, D. Phelps, R. Gorlick, R.B. Lock, C.P. Reynolds, J.M. Maris, H.S. Friedman, J. Dome, J. Khoury, T.J. Triche, R.C. Seeger, R. Gilbertson, J. Khan, M.A. Smith, P.J. Houghton. Molecular characterization of the pediatric preclinical testing panel. *Clinical Cancer Res* (in Press)

[5] Z. Wu, and R.A. Irizarry, Preprocessing of oligonucleotide array data. *Nat Biotechnol* 22 (2004) 656-8.

[6] C.L. Morton, P.M. Potter: Rhabdomyosarcoma-specific expression of the herpes simplex virus thymidine kinase gene confers sensitivity to ganciclovir. *J Pharmacol Exp Ther* 1998, 286(2):1066-1073.

**Supplemental Table 1. Neuroblastoma samples used in the study**

| Sample label   | Year of Diagnosis | Sample Source | Age at Diagnosis (yrs) | INSS Stage | MYCN Amplification Status | Shimada Histology | COG Risk Stratification | Years of Survival | Clinical Outcome |
|----------------|-------------------|---------------|------------------------|------------|---------------------------|-------------------|-------------------------|-------------------|------------------|
| St1_NA_NB17_A  | 2000              | 2             | 1.2                    | 1          | NA                        | F                 | L                       | 3.5               | A                |
| St1_NA_NB208_A | 1995              | 1             | 0.8                    | 1          | NA                        | F                 | L                       | 4.8               | A                |
| St1_NA_NB221_A | 1997              | 1             | 0.4                    | 1          | NA                        | F                 | L                       | 5.7               | A                |
| St1_NA_NB237_A | 1999              | 1             | 4.1                    | 1          | NA                        | F                 | L                       | 3.2               | A                |
| St1_NA_NB29_A  | 1998              | 2             | 0.3                    | 1          | NA                        | F                 | L                       | 5.1               | A                |
| St1_NA_NB33_A  | 1998              | 2             | 1.4                    | 1          | NA                        | F                 | L                       | 4.8               | A                |
| St1_NA_NB34_A  | 1997              | 2             | 1.2                    | 1          | NA                        | F                 | L                       | 5.2               | A                |
| St1_NA_NB7_A   | 1998              | 2             | 1.3                    | 1          | NA                        | -                 | L                       | 5.2               | A                |
| St1_NA_NB77_A  | 1994              | 2             | 0.2                    | 1          | NA                        | -                 | L                       | 9.7               | A                |
| St1_NA_NB9_A   | 1996              | 2             | 1.1                    | 1          | NA                        | -                 | L                       | 7.1               | A                |
| St2_NA_NB220_A | 1997              | 1             | 0.4                    | 2          | NA                        | F                 | L                       | 6                 | A                |
| St2_NA_NB231_A | 1998              | 1             | 0.5                    | 2          | NA                        | F                 | L                       | 4                 | A                |
| St2_NA_NB232_A | 1998              | 1             | 0.1                    | 2          | NA                        | F                 | L                       | 4.3               | A                |
| St2_NA_NB235_A | 1999              | 1             | 0.4                    | 2          | NA                        | F                 | L                       | 3.2               | A                |
| St3_NA_NB201_A | 1994              | 1             | 1.5                    | 3          | NA                        | UF                | H                       | 7.4               | A                |
| St3_NA_NB215_A | 1996              | 1             | 1.2                    | 3          | NA                        | F                 | I                       | 7.3               | A                |
| St3_NA_NB216_A | 1996              | 1             | 0.6                    | 3          | NA                        | -                 | I                       | 6.8               | A                |
| St3_NA_NB61_A  | 1997              | 2             | 1.4                    | 3          | NA                        | F                 | I                       | 6.3               | A                |
| St4_A_NB14_A   | 2000              | 2             | 0.9                    | 4          | AMP                       | -                 | H                       | 3.2               | A                |
| St4_NA_NB24_A  | 2000              | 2             | 0.6                    | 4          | NA                        | F                 | I                       | 3                 | A                |
| St4_NA_NB269_A | 1997              | 3             | 0.8                    | 4          | NA                        | -                 | I                       | 5.3               | A                |
| St4_NA_NB282_A | 1999              | 1             | 4.6                    | 4          | NA                        | UF                | H                       | 3.3               | A                |
| St4_NA_NB30_A  | 1997              | 2             | 0.9                    | 4          | NA                        | F                 | I                       | 5.9               | A                |
| St4_NA_NB31_A  | 1997              | 2             | 1.4                    | 4          | NA                        | F                 | H                       | 6.7               | A                |
| St4_NA_NB32_A  | 1998              | 2             | 1.2                    | 4          | NA                        | F                 | H                       | 5.7               | A                |
| St4_NA_NB35_A  | 1997              | 2             | 2.6                    | 4          | NA                        | -                 | H                       | 6.5               | A                |
| St2_NA_NB18_D  | 2000              | 2             | 1.8                    | 2          | NA                        | -                 | L                       | 1.4               | D                |
| St3_A_NB72_D   | 1994              | 2             | 3                      | 3          | AMP                       | -                 | H                       | 1                 | D                |
| St3_A_NB75_D   | 1998              | 2             | 1                      | 3          | AMP                       | F                 | H                       | 3                 | D                |
| St4_A_NB21_D   | 2000              | 2             | 5.2                    | 4          | AMP                       | -                 | H                       | 0.6               | D                |
| St4_A_NB265_D  | 1996              | 3             | 1.8                    | 4          | AMP                       | -                 | H                       | 2                 | D                |
| St4_A_NB266_D  | 1996              | 3             | 2                      | 4          | AMP                       | -                 | H                       | 0                 | D                |
| St4_A_NB27_D   | 2000              | 2             | 10.5                   | 4          | AMP                       | UF                | H                       | 1.4               | D                |
| St4_A_NB278_D  | 1999              | 1             | 1.7                    | 4          | AMP                       | UF                | H                       | 0.8               | D                |
| St4_NA_NB205_D | 1995              | 1             | 3.9                    | 4          | NA                        | -                 | H                       | 2.3               | D                |
| St4_NA_NB206_D | 1995              | 1             | 3.3                    | 4          | NA                        | UF                | H                       | 5.8               | D                |
| St4_NA_NB207_D | 1995              | 1             | 4.4                    | 4          | NA                        | -                 | H                       | 3.1               | D                |
| St4_NA_NB210_D | 1996              | 1             | 2.3                    | 4          | NA                        | UF                | H                       | 1.1               | D                |
| St4_NA_NB275_D | 1995              | 1             | 1.2                    | 4          | NA                        | UF                | H                       | 1                 | D                |
| St4_NA_NB283_D | 1999              | 1             | 5.5                    | 4          | NA                        | UF                | H                       | 4                 | D                |
| St4_NA_NB69_D  | 1992              | 2             | 4.4                    | 4          | NA                        | -                 | H                       | 0.5               | D                |
| St4_NA_NB8_D   | 1998              | 2             | 4.6                    | 4          | NA                        | -                 | H                       | 1.8               | D                |

**NOTE:**

Sample Source: 1= Cooperative Human Tissue Network (CHTN, Ohio, USA); 2=German Cancer Research Center (GCRC);

3=The Children's Hospital at Westmead (CHW, Australia). INSS= International Neuroblastoma Staging System.

MYCN amplification status: AMP=amplification; NA= not amplified. Shimada Histology: F=favorable, "-"= not known, UF= unfavorable.

COG risk stratification: H=high-risk; I=intermediate-risk; L=low-risk. Ave. ANN Vote= average ANN committee votes.

Clinical Outcome: A= alive without event; D= deceased due to NB disease.

**Supplemental Table 2. FDR report**

| <b>Variable Name</b>        | <b>Cutoff Value</b> | <b>No. of Significant p-values</b> |
|-----------------------------|---------------------|------------------------------------|
| p-value(Platform)           | 4.02E-06            | 0                                  |
| p-value(Prognosis)          | 0.016               | 3632                               |
| p-value(Platform*Prognosis) | 8.44E-05            | 21                                 |

**Supplemental Table 3. GO analysis of the significant genes**

| <b>Expression System</b> | <b>Gene Category</b>  | <b>p-value</b>                                                   | <b>Bonferroni(p&lt;0.01)</b> |          |
|--------------------------|-----------------------|------------------------------------------------------------------|------------------------------|----------|
| High in Dead             | GO Cellular Component | intracellular                                                    | 3.13E-20                     | 5.49E-17 |
|                          | GO Cellular Component | mitochondrion                                                    | 5.71E-14                     | 1.00E-10 |
|                          | GO Biological Process | metabolism                                                       | 7.40E-13                     | 1.30E-09 |
|                          | GO Cellular Component | ribonucleoprotein complex                                        | 1.12E-09                     | 1.97E-06 |
|                          | GO Biological Process | mitotic cell cycle                                               | 9.53E-09                     | 1.67E-05 |
|                          | GO Cellular Component | nucleolus                                                        | 1.18E-08                     | 2.08E-05 |
|                          | GO Molecular Function | structural constituent of ribosome                               | 4.31E-08                     | 7.56E-05 |
|                          | GO Cellular Component | nucleus                                                          | 1.20E-07                     | 2.11E-04 |
|                          | GO Cellular Component | cytoplasm                                                        | 1.43E-07                     | 2.51E-04 |
|                          | GO Biological Process | biosynthesis                                                     | 7.78E-07                     | 1.37E-03 |
|                          | GO Biological Process | RNA metabolism                                                   | 9.87E-07                     | 1.73E-03 |
|                          | GO Biological Process | RNA processing                                                   | 1.13E-06                     | 1.99E-03 |
|                          | GO Biological Process | DNA metabolism                                                   | 1.65E-06                     | 2.90E-03 |
|                          | GO Biological Process | nucleobase\, nucleoside\, nucleotide and nucleic acid metabolism | 2.22E-06                     | 3.90E-03 |
|                          | GO Cellular Component | cell                                                             | 2.27E-06                     | 3.99E-03 |
|                          | GO Biological Process | macromolecule biosynthesis                                       | 3.38E-06                     | 5.93E-03 |
|                          | GO Biological Process | cell cycle                                                       | 4.39E-06                     | 7.71E-03 |
| GO Cellular Component    | ribosome              | 5.48E-06                                                         | 9.62E-03                     |          |
| GO Biological Process    | protein biosynthesis  | 5.67E-06                                                         | 9.95E-03                     |          |
| High in Alive            | GO Molecular Function | signal transducer activity                                       | 5.85E-06                     | 7.13E-03 |

**Supplemental Table 4. Pediatric xenograft samples used in the study**

| Name               | Tumor Line   | Histological Diagnosis | ANN Diagnosis | Data source                 | ANN committee vote |      |      |
|--------------------|--------------|------------------------|---------------|-----------------------------|--------------------|------|------|
|                    |              |                        |               |                             | RMS                | EWS  | NB   |
| cDNA_aRMS_Rh1      | Rh1          | aRMS                   | EWS **        | Whiteford et al [14]        | 0.06               | 0.96 | 0.03 |
| cDNA_aRMS_Rh6      | Rh6          | aRMS                   | RMS           | Whiteford et al [14]        | 0.44               | 0.37 | 0.30 |
| cDNA_eRMS_Rh12     | Rh12         | eRMS                   | RMS           | Whiteford et al [14]        | 0.81               | 0.09 | 0.19 |
| cDNA_eRMS_Rh14     | Rh14         | eRMS                   | RMS           | Whiteford et al [14]        | 0.85               | 0.07 | 0.18 |
| cDNA_EWS_CB-AGPN   | CB-AGPN      | EWS                    | EWS           | Whiteford et al [14]        | 0.30               | 0.66 | 0.12 |
| cDNA_EWS_CHP-100   | CHP-100      | EWS                    | EWS           | Whiteford et al [14]        | 0.48               | 0.66 | 0.02 |
| cDNA_EWS_KAG-ews   | KAG-ews      | EWS                    | EWS           | Whiteford et al [14]        | 0.16               | 0.89 | 0.02 |
| cDNA_EWS_SK-N-MC   | SK-N-MC      | EWS                    | EWS           | Whiteford et al [14]        | 0.18               | 0.85 | 0.03 |
| cDNA_EWS_SK-PN-DW  | SK-PN-DW     | EWS                    | EWS           | Whiteford et al [14]        | 0.36               | 0.69 | 0.04 |
| cDNA_EWS_TC-268    | TC-268       | EWS                    | EWS           | Whiteford et al [14]        | 0.35               | 0.56 | 0.20 |
| cDNA_EWS_TC-32     | TC-32        | EWS                    | EWS           | Whiteford et al [14]        | 0.20               | 0.77 | 0.14 |
| cDNA_EWS_VW-ews    | VW-ews       | EWS                    | EWS           | Whiteford et al [14]        | 0.35               | 0.80 | 0.02 |
| cDNA_NB_15N        | 15N (LA-N-1) | NB                     | NB            | Whiteford et al [14]        | 0.14               | 0.02 | 0.96 |
| cDNA_NB_CHLA-255   | CHLA-255     | NB                     | NB            | Whiteford et al [14]        | 0.07               | 0.05 | 0.96 |
| cDNA_NB_LA-N-5     | LA-N-5       | NB                     | NB            | Whiteford et al [14]        | 0.07               | 0.01 | 0.97 |
| cDNA_NB_SH-SY5Y    | SH-SY5Y      | NB                     | NB            | Whiteford et al [14]        | 0.23               | 0.03 | 0.89 |
| cDNA_NB_SK-N-BE(2) | SK-N-BE(2)   | NB                     | NB            | Whiteford et al [14]        | 0.04               | 0.03 | 0.97 |
| cDNA_NB_SK-N-DZ    | SK-N-DZ      | NB                     | NB            | Whiteford et al [14]        | 0.20               | 0.02 | 0.93 |
| cDNA_NB_SK-N-SH    | SK-N-SH      | NB                     | NB            | Whiteford et al [14]        | 0.32               | 0.09 | 0.80 |
| cDNA_NB_SMS-KCNR   | SMS_KCNR     | NB                     | NB            | Whiteford et al [14]        | 0.06               | 0.02 | 0.97 |
| cDNA_NB_SMS-LHN    | SMS-LHN      | NB                     | NB            | Whiteford et al [14]        | 0.13               | 0.06 | 0.91 |
| cDNA_NB_SMS-SAN    | SMS-SAN      | NB                     | NB            | Whiteford et al [14]        | 0.03               | 0.02 | 0.98 |
| affy_aRMS_Rh10     | Rh10         | aRMS                   | RMS           | Neale et al (in submission) | 0.93               | 0.09 | 0.03 |
| affy_aRMS_Rh28     | Rh28         | aRMS                   | RMS           | Neale et al (in submission) | 0.85               | 0.13 | 0.11 |
| affy_aRMS_Rh30     | Rh30         | aRMS                   | RMS           | Neale et al (in submission) | 0.90               | 0.05 | 0.08 |
| affy_aRMS_Rh41     | Rh41         | aRMS                   | RMS           | Neale et al (in submission) | 0.94               | 0.11 | 0.03 |
| affy_aRMS_Rh65     | Rh65         | aRMS                   | RMS           | Neale et al (in submission) | 0.89               | 0.10 | 0.07 |
| affy_eRMS_Rh18     | Rh18         | eRMS                   | RMS           | Neale et al (in submission) | 0.45               | 0.43 | 0.23 |
| affy_eRMS_Rh36     | Rh36         | eRMS                   | RMS           | Neale et al (in submission) | 0.89               | 0.09 | 0.08 |
| affy_EWS_CHLA258   | CHLA258      | EWS                    | EWS           | Neale et al (in submission) | 0.05               | 0.91 | 0.15 |
| affy_EWS_EW5       | EW5          | EWS                    | EWS           | Neale et al (in submission) | 0.06               | 0.94 | 0.06 |
| affy_EWS_EW8       | EW8          | EWS                    | EWS           | Neale et al (in submission) | 0.21               | 0.81 | 0.04 |
| affy_EWS_SKNEP     | SKNEP        | EWS                    | EWS           | Neale et al (in submission) | 0.26               | 0.72 | 0.10 |
| affy_EWS_TC-71     | TC-71        | EWS                    | EWS           | Neale et al (in submission) | 0.09               | 0.87 | 0.08 |
| affy_NB_CHLA-79    | CHLA-79      | NB                     | NB            | Neale et al (in submission) | 0.02               | 0.04 | 0.97 |
| affy_NB_NB-1382    | NB-1382      | NB                     | NB            | Neale et al (in submission) | 0.02               | 0.04 | 0.98 |
| affy_NB_NB-1643    | NB-1643      | NB                     | NB            | Neale et al (in submission) | 0.02               | 0.04 | 0.98 |
| affy_NB_NB-1691    | NB-1691      | NB                     | NB            | Neale et al (in submission) | 0.07               | 0.10 | 0.92 |
| affy_NB_NB-1771    | NB-1771      | NB                     | NB            | Neale et al (in submission) | 0.03               | 0.04 | 0.97 |
| affy_NB_NB-EBc1    | NB-EBc1      | NB                     | NB            | Neale et al (in submission) | 0.04               | 0.07 | 0.95 |
| affy_NB_NB-SD      | NB-SD        | NB                     | NB            | Neale et al (in submission) | 0.03               | 0.04 | 0.97 |
| affy_NB_SK-N-AS    | SK-N-AS      | NB                     | NB            | Neale et al (in submission) | 0.03               | 0.06 | 0.97 |

Note:

- \*\* Rh1 was initially diagnosed as eRMS, however review by others has reclassified it as primitive neuroectoderm tumor, which is a member of the Ewing's family of tumors [6].
- Abbreviations: aRMS, alveolar rhabdomyosarcoma; eRMS, embryonal rhabdomyosarcoma; EWS, Ewing's sarcoma; NB, neuroblastoma.

**Supplemental Table 5: Genes with significant interaction between prognosis and platform**

| <b>UGCluster</b> | <b>Gene Symbol</b> | <b>ClonID</b> | <b>probeset</b> | <b>p-value(Platform * Prognosis)</b> |
|------------------|--------------------|---------------|-----------------|--------------------------------------|
| Hs.293798        | ZNF436             | 196824        | 226114_at_B     | 4.54E-07                             |
| Hs.473838        | DSCR2              | 843224        | 203405_at_A     | 7.18E-07                             |
| Hs.632368        | EXOSC10            | 841179        | 207541_s_at_A   | 4.61E-06                             |
| Hs.410965        | DGCR6              | 471266        | 208024_s_at_A   | 7.57E-06                             |
| Hs.154276        | BACH1              | 1638852       | 234315_at_B     | 1.09E-05                             |
| Hs.200016        | NUDT11             | 53162         | 219855_at_A     | 1.34E-05                             |
| Hs.591704        | BTC                | 1535554       | 207326_at_A     | 1.53E-05                             |
| Hs.522699        | COX7B              | 35612         | 202110_at_A     | 2.16E-05                             |
| Hs.442291        | LOC345222          | 1751293       | 237434_x_at_B   | 2.50E-05                             |
| Hs.525752        | KLF13              | 251529        | 225390_s_at_B   | 2.62E-05                             |
| Hs.472564        | C20orf52           | 1635665       | 224972_at_B     | 3.34E-05                             |
| Hs.437072        | CNIH2              | 32226         | 230070_at_B     | 3.35E-05                             |
| Hs.505806        | PBXIP1             | 366042        | 212259_s_at_A   | 3.44E-05                             |
| Hs.83190         | FASN               | 179276        | 212218_s_at_A   | 3.70E-05                             |
| Hs.206770        | ZBTB22             | 49319         | 213081_at_A     | 4.37E-05                             |
| Hs.109212        | KLHL17             | 190915        | 229792_at_B     | 4.39E-05                             |
| Hs.128330        | ---                | 1586060       | 236411_at_B     | 4.42E-05                             |
| Hs.521568        | GCNT1              | 2800783       | 239761_at_B     | 4.80E-05                             |
| Hs.189716        | NDUFAB1            | 782635        | 202077_at_A     | 5.67E-05                             |
| Hs.555978        | RABEP2             | 342158        | 77508_r_at_A    | 6.19E-05                             |
| Hs.513984        | FLII               | 826204        | 212025_s_at_A   | 7.41E-05                             |
| Hs.512767        | DKFZP761H1710      | 124143        | 221273_s_at_A   | 9.25E-05                             |
| Hs.379754        | LOC340061          | 81662         | 224916_at_B     | 9.53E-05                             |
| Hs.417628        | CRHR1              | 44692         | 208593_x_at_A   | 0.000106586                          |
| Hs.7036          | NAGK               | 2511663       | 218231_at_A     | 0.000107878                          |
| Hs.632380        | GALE               | 711768        | 202528_at_A     | 0.000151759                          |
| Hs.544767        | ---                | 251417        | 243989_at_B     | 0.000189463                          |
| Hs.534334        | NOL1               | 280970        | 214427_at_A     | 0.000190984                          |
| Hs.410830        | C21orf70           | 1557018       | 243750_x_at_B   | 0.0001927                            |
| Hs.24054         | JAGN1              | 1636756       | 223104_at_B     | 0.000194335                          |
| Hs.73677         | RFX1               | 611964        | 226786_at_B     | 0.000197967                          |
| Hs.534870        | ---                | 1502186       | 239081_at_B     | 0.000204763                          |
| Hs.367690        | C15orf17           | 195346        | 224798_s_at_B   | 0.00021968                           |
| Hs.90280         | ATIC               | 449020        | 208758_at_A     | 0.000223524                          |
| Hs.279761        | CHMP4A             | 76252         | 218572_at_A     | 0.000255838                          |
| Hs.508958        | STXBP6             | 788524        | 220995_at_A     | 0.000285238                          |
| Hs.523718        | SFN                | 2027515       | 33322_i_at_A    | 0.000287124                          |
| Hs.104134        | HMX1               | 2017947       | 207353_s_at_A   | 0.000300168                          |
| Hs.507290        | KARCA1             | 795851        | 227582_at_B     | 0.000303173                          |
| Hs.534375        | B3GALT4            | 1601661       | 210205_at_A     | 0.000304245                          |
| Hs.129711        | HAVCR1             | 2779608       | 207052_at_A     | 0.000309808                          |
| Hs.104650        | FLJ10292           | 1664710       | 222776_at_B     | 0.00031552                           |
| Hs.591803        | C6orf142           | 251769        | 235377_at_B     | 0.000343315                          |
| Hs.469316        | LOC643085          | 207275        | 229224_x_at_B   | 0.000401426                          |
| Hs.244590        | BTBD3              | 866633        | 243462_s_at_B   | 0.000406624                          |
| Hs.201918        | HIPK3              | 1580803       | 207764_s_at_A   | 0.000463301                          |
| Hs.249718        | EIF4E              | 1580219       | 201437_s_at_A   | 0.000487709                          |
| Hs.143873        | S100A10            | 756595        | 238909_at_B     | 0.000499164                          |
| Hs.589427        | PCOLN3             | 261971        | 201933_at_A     | 0.000519157                          |



|           |           |         |               |             |
|-----------|-----------|---------|---------------|-------------|
| Hs.522615 | NDP       | 878835  | 206022_at_A   | 0.000608928 |
| Hs.109059 | MRPL12    | 1636069 | 203931_s_at_A | 0.000620437 |
| Hs.372840 | APBB1     | 184022  | 202652_at_A   | 0.000636672 |
| Hs.465818 | ADAMTS10  | 2760176 | 230341_x_at_B | 0.000661722 |
| Hs.7884   | SLCO2B1   | 2491247 | 211557_x_at_A | 0.000664768 |
| Hs.86970  | C8orf53   | 1466942 | 227836_at_B   | 0.000679764 |
| Hs.590939 | TFPT      | 1605473 | 218996_at_A   | 0.000688456 |
| Hs.269571 | MYCNOS    | 1031203 | 216188_at_A   | 0.000689978 |
| Hs.596918 | GABPB2    | 1557288 | 227406_at_B   | 0.000735758 |
| Hs.133534 | KSR1      | 1636511 | 235252_at_B   | 0.00075609  |
| Hs.505337 | CLDN5     | 243181  | 204482_at_A   | 0.000758694 |
| Hs.103315 | ZNF384    | 588559  | 212369_at_A   | 0.000792367 |
| Hs.526975 | LARS2     | 172495  | 34764_at_A    | 0.00086895  |
| Hs.26550  | RXRG      | 358433  | 205954_at_A   | 0.000880736 |
| Hs.534342 | RNF5      | 2557375 | 209111_at_A   | 0.000972887 |
| Hs.73739  | HTR7      | 46611   | 236281_x_at_B | 0.000982293 |
| Hs.73986  | CLK2      | 713080  | 203229_s_at_A | 0.000991503 |
| Hs.437957 | Magmas    | 502277  | 218969_at_A   | 0.000992242 |
| Hs.25040  | ZNF239    | 2324268 | 206261_at_A   | 0.00100944  |
| Hs.527909 | EDG7      | 784200  | 220816_at_A   | 0.00104979  |
| Hs.193557 | ---       | 767164  | 242321_at_B   | 0.00106155  |
| Hs.65734  | ARNTL     | 50519   | 210971_s_at_A | 0.00106632  |
| Hs.593575 | ---       | 858375  | 229351_at_B   | 0.00110962  |
| Hs.586945 | ---       | 1688746 | 238442_at_B   | 0.00111697  |
| Hs.31210  | BCL3      | 755923  | 204908_s_at_A | 0.00112043  |
| Hs.514038 | FLOT2     | 156386  | 211299_s_at_A | 0.00114366  |
| Hs.198003 | SARDH     | 1870053 | 210862_s_at_A | 0.00114543  |
| Hs.273621 | CNP       | 46786   | 208912_s_at_A | 0.00115361  |
| Hs.513726 | GBP5      | 841492  | 229625_at_B   | 0.0011609   |
| Hs.326941 | SCIN      | 240430  | 222272_x_at_A | 0.00116955  |
| Hs.90875  | RABIF     | 360168  | 204477_at_A   | 0.00117244  |
| Hs.123116 | SLC12A1   | 1553719 | 220281_at_A   | 0.00121199  |
| Hs.45002  | RAC3      | 281978  | 206103_at_A   | 0.00121744  |
| Hs.505924 | HMGA2     | 261204  | 208025_s_at_A | 0.00125147  |
| Hs.489354 | MUC3B     | 2229550 | 217117_x_at_A | 0.00127737  |
| Hs.524496 | C1orf113  | 769002  | 220193_at_A   | 0.00131056  |
| Hs.310893 | CSDC2     | 51221   | 209981_at_A   | 0.00131058  |
| Hs.503716 | DCUN1D5   | 625933  | 223151_at_B   | 0.00137811  |
| Hs.134726 | C18orf24  | 564981  | 217640_x_at_A | 0.00142054  |
| Hs.632415 | PLK3      | 825080  | 215462_at_A   | 0.00145432  |
| Hs.281707 | PUM1      | 229969  | 201165_s_at_A | 0.00155902  |
| Hs.143751 | MMP11     | 487296  | 203878_s_at_A | 0.00160134  |
| Hs.111732 | FCGBP     | 154172  | 203240_at_A   | 0.00164612  |
| Hs.523080 | C10orf56  | 489509  | 212419_at_A   | 0.00166941  |
| Hs.79033  | QPCT      | 711918  | 205174_s_at_A | 0.0017007   |
| Hs.490394 | TAS2R5    | 815110  | 231757_at_B   | 0.00170334  |
| Hs.380704 | FGF11     | 49284   | 227271_at_B   | 0.00175473  |
| Hs.517029 | C20orf102 | 192419  | 226973_at_B   | 0.00178436  |
| Hs.98367  | SOX17     | 770979  | 219993_at_A   | 0.00178985  |
| Hs.128292 | ---       | 1637316 | 230960_at_B   | 0.00189156  |
| Hs.501898 | MRVI1     | 323780  | 224550_s_at_B | 0.00192401  |
| Hs.118400 | FSCN1     | 2566856 | 201564_s_at_A | 0.00198235  |

|           |           |         |               |            |
|-----------|-----------|---------|---------------|------------|
| Hs.191215 | PSCD1     | 814546  | 202879_s_at_A | 0.00200133 |
| Hs.160550 | SLC43A2   | 135654  | 228918_at_B   | 0.00201623 |
| Hs.327179 | SLC17A3   | 1323539 | 207298_at_A   | 0.00204119 |
| Hs.582050 | THAP9     | 1845627 | 230185_at_B   | 0.00204277 |
| Hs.467862 | KIAA1240  | 39574   | 232908_at_B   | 0.00204481 |
| Hs.11042  | PDZD11    | 810402  | 223037_at_B   | 0.00212046 |
| Hs.538438 | LOC653468 | 487938  | 243937_x_at_B | 0.00216299 |
| Hs.235795 | LOC643424 | 413089  | 229635_at_B   | 0.00217257 |
| Hs.95260  | FAM8A1    | 2312236 | 203420_at_A   | 0.00220256 |
| Hs.367833 | SLC28A2   | 1416142 | 216432_at_A   | 0.0022158  |
| Hs.220529 | CEACAM5   | 586706  | 201884_at_A   | 0.00229044 |
| Hs.288382 | C16orf56  | 773284  | 218148_at_A   | 0.0022924  |
| Hs.591336 | SESN1     | 813584  | 218346_s_at_A | 0.00231147 |
| Hs.531254 | LRRIQ1    | 279826  | 223817_at_B   | 0.00237437 |
| Hs.443140 | LOC201181 | 32782   | 241383_at_B   | 0.0024119  |
| Hs.591536 | RSC1A1    | 151251  | 214583_at_A   | 0.00251805 |
| Hs.284232 | PLEKHG5   | 136317  | 227142_at_B   | 0.00252084 |
| Hs.98967  | ATP6V0A4  | 1917784 | 220197_at_A   | 0.00256873 |
| Hs.71428  | C9orf18   | 743481  | 229976_at_B   | 0.00259936 |
| Hs.150557 | KLF9      | 302549  | 203543_s_at_A | 0.00268543 |
| Hs.591158 | ART4      | 1715418 | 207220_at_A   | 0.00270206 |
| Hs.88045  | ---       | 1625160 | 230312_at_B   | 0.00270588 |
| Hs.489786 | CFTR      | 2498575 | 234702_x_at_B | 0.0027061  |
| Hs.254113 | POLRMT    | 827129  | 203783_x_at_A | 0.00279353 |
| Hs.303870 | KCNC1     | 1859326 | 208477_at_A   | 0.00283522 |
| Hs.445534 | PER1      | 120108  | 202861_at_A   | 0.00295769 |
| Hs.515340 | LRP3      | 2018820 | 204381_at_A   | 0.00297396 |
| Hs.23033  | UBE2Q2    | 2507980 | 224747_at_B   | 0.00306373 |
| Hs.524953 | KL        | 897271  | 205978_at_A   | 0.00309471 |
| Hs.591088 | IL11RA    | 811920  | 204773_at_A   | 0.00314535 |
| Hs.596942 | ---       | 280381  | 244389_at_B   | 0.00314854 |
| Hs.33102  | TFAP2B    | 363144  | 215686_x_at_A | 0.00318807 |
| Hs.158852 | LMAN2L    | 842851  | 221274_s_at_A | 0.00321999 |
| Hs.436061 | IRF1      | 740476  | 202531_at_A   | 0.0034116  |
| Hs.94107  | GSTA2     | 248545  | 242478_at_B   | 0.00346223 |
| Hs.503048 | IGHMBP2   | 1569465 | 31861_at_A    | 0.00346758 |
| Hs.476306 | WDR51A    | 462333  | 234749_s_at_B | 0.00346913 |
| Hs.521651 | STMN2     | 2306752 | 203001_s_at_A | 0.00348316 |
| Hs.526920 | RTDR1     | 52802   | 229977_at_B   | 0.00350156 |
| Hs.534052 | ZFP36     | 23804   | 201531_at_A   | 0.00362276 |
| Hs.415172 | RABL4     | 431632  | 205037_at_A   | 0.00363469 |
| Hs.525006 | NUFIP1    | 240223  | 205135_s_at_A | 0.00364875 |
| Hs.479396 | RBPSUH    | 129725  | 229540_at_B   | 0.0036757  |
| Hs.4276   | BHLHB9    | 26259   | 213709_at_A   | 0.00370192 |
| Hs.584852 | MAB21L2   | 866660  | 210302_s_at_A | 0.00378539 |
| Hs.534513 | FLJ20021  | 269820  | 228832_at_B   | 0.00379927 |
| Hs.513530 | TGFB111   | 811848  | 209651_at_A   | 0.00380735 |
| Hs.435302 | ZNF3      | 511814  | 219605_at_A   | 0.00383719 |
| Hs.363087 | FLJ12684  | 45629   | 219987_at_A   | 0.00400395 |
| Hs.19193  | LOC400043 | 796495  | 226582_at_B   | 0.00401599 |
| Hs.131810 | ---       | 1655450 | 230256_at_B   | 0.00402004 |
| Hs.631562 | PLA2G4C   | 2556649 | 209785_s_at_A | 0.00404735 |

|           |               |         |               |            |
|-----------|---------------|---------|---------------|------------|
| Hs.494648 | TEX10         | 824847  | 218104_at_A   | 0.00414888 |
| Hs.436787 | RP11-308D16.4 | 209518  | 242012_at_B   | 0.00417992 |
| Hs.593315 | ---           | 73960   | 242203_at_B   | 0.00421896 |
| Hs.577753 | LARP4         | 1856516 | 212714_at_A   | 0.00422908 |
| Hs.99405  | ---           | 813474  | 241138_at_B   | 0.00427032 |
| Hs.633139 | ---           | 681891  | 235732_at_B   | 0.00431831 |
| Hs.73800  | SELP          | 2249736 | 206049_at_A   | 0.00436171 |
| Hs.634038 | ---           | 815046  | 232739_at_B   | 0.00442129 |
| Hs.530463 | MGC3196       | 1543840 | 220934_s_at_A | 0.00450403 |
| Hs.596513 | LOC153546     | 1688853 | 236124_at_B   | 0.00450645 |
| Hs.30011  | TMEM93        | 796117  | 221255_s_at_A | 0.00451027 |
| Hs.562457 | KLRD1         | 1901363 | 207796_x_at_A | 0.00454251 |
| Hs.513145 | NGRN          | 303105  | 224281_s_at_B | 0.00455161 |
| Hs.355952 | LOC150223     | 809974  | 227042_at_B   | 0.00457655 |
| Hs.274579 | CNNM1         | 25159   | 220166_at_A   | 0.0046416  |
| Hs.1755   | FGF4          | 2908538 | 206783_at_A   | 0.0046629  |
| Hs.490991 | PINX1         | 824460  | 223907_s_at_B | 0.00473955 |
| Hs.149020 | KIAA1772      | 431748  | 220340_at_A   | 0.00474388 |
| Hs.74870  | HLX1          | 1560977 | 214438_at_A   | 0.00481196 |
| Hs.195710 | ZNF503        | 810457  | 227195_at_B   | 0.00482116 |
| Hs.381912 | SPRY3         | 450396  | 232157_at_B   | 0.00487339 |
| Hs.468490 | LHCGR         | 1844334 | 207240_s_at_A | 0.00492432 |
| Hs.50868  | SLC22A18      | 742862  | 204981_at_A   | 0.00493792 |
| Hs.249125 | TLX3          | 1860115 | 208495_at_A   | 0.00495848 |
| Hs.119598 | RPL3          | 365945  | 201217_x_at_A | 0.00497632 |
| Hs.343334 | SPRYD3        | 49481   | 225134_at_B   | 0.00514948 |
| Hs.209614 | MARVELD1      | 1873653 | 234917_at_B   | 0.0052757  |
| Hs.594817 | POU6F1        | 289447  | 216330_s_at_A | 0.00530667 |
| Hs.450763 | LEFTY2        | 1843843 | 206012_at_A   | 0.0053165  |
| Hs.525015 | ---           | 841220  | 235211_at_B   | 0.00534531 |
| Hs.63489  | PTPN6         | 2307001 | 206687_s_at_A | 0.00544254 |
| Hs.520339 | COL10A1       | 2421971 | 217428_s_at_A | 0.00545792 |
| Hs.591258 | CD74          | 155916  | 209619_at_A   | 0.00551593 |
| Hs.431109 | STX8          | 1710829 | 204690_at_A   | 0.00553331 |
| Hs.335049 | GNAT3         | 1908423 | 216590_at_A   | 0.0055605  |
| Hs.274363 | NGB           | 25409   | 236677_at_B   | 0.00556257 |
| Hs.632219 | SOLH          | 2385051 | 204275_at_A   | 0.0057056  |
| Hs.93670  | NHN1          | 1558392 | 240535_at_B   | 0.00573606 |
| Hs.437599 | HPS5          | 194297  | 204544_at_A   | 0.00586425 |
| Hs.88778  | CBR1          | 711552  | 209213_at_A   | 0.00586962 |
| Hs.6551   | ATP6AP1       | 841689  | 207809_s_at_A | 0.00589581 |
| Hs.523468 | SCUBE2        | 242778  | 219197_s_at_A | 0.00590295 |
| Hs.274361 | ACCN2         | 1635320 | 205156_s_at_A | 0.0059286  |
| Hs.127111 | TEKT2         | 1562854 | 210323_at_A   | 0.0059338  |
| Hs.592928 | ---           | 714151  | 242705_x_at_B | 0.00597367 |
| Hs.8035   | RASL11B       | 773142  | 219142_at_A   | 0.00604051 |
| Hs.513230 | MRPL28        | 1592276 | 204599_s_at_A | 0.00606523 |
| Hs.478741 | C3orf21       | 1858159 | 226891_at_B   | 0.00606549 |
| Hs.516802 | KIF1A         | 221828  | 203850_s_at_A | 0.00629812 |
| Hs.252543 | IKIP          | 430970  | 235202_x_at_B | 0.00633293 |
| Hs.203    | CCKBR         | 844601  | 210381_s_at_A | 0.00643852 |
| Hs.143102 | AOC2          | 878161  | 207064_s_at_A | 0.00648094 |

|           |           |         |               |            |
|-----------|-----------|---------|---------------|------------|
| Hs.435761 | PIAS3     | 2563108 | 203035_s_at_A | 0.00651153 |
| Hs.368996 | RLN1      | 2015997 | 211753_s_at_A | 0.00654347 |
| Hs.388364 | RNF175    | 37823   | 236465_at_B   | 0.00657396 |
| Hs.50319  | ---       | 431792  | 239291_at_B   | 0.00662065 |
| Hs.376071 | CCND2     | 366412  | 200953_s_at_A | 0.0066312  |
| Hs.414099 | TNRC5     | 809682  | 228369_at_B   | 0.00663825 |
| Hs.13845  | SLC25A20  | 247831  | 203658_at_A   | 0.00680868 |
| Hs.102866 | TKTL1     | 1543346 | 216370_s_at_A | 0.00683912 |
| Hs.43818  | ---       | 726767  | 237365_at_B   | 0.006941   |
| Hs.516855 | CENPB     | 809720  | 212437_at_A   | 0.00700593 |
| Hs.544106 | RNF180    | 321807  | 242033_at_B   | 0.00703337 |
| Hs.1041   | ROS1      | 840514  | 244363_at_B   | 0.00726074 |
| Hs.132576 | PAX9      | 1683351 | 207059_at_A   | 0.00739892 |
| Hs.485572 | SOCS2     | 491121  | 203373_at_A   | 0.00741224 |
| Hs.479386 | LOC389203 | 251806  | 225014_at_B   | 0.00758897 |
| Hs.24956  | C14orf173 | 811907  | 218144_s_at_A | 0.00762288 |
| Hs.173311 | RPUSD2    | 131988  | 221940_at_A   | 0.0077078  |
| Hs.132682 | PSMB9     | 1456118 | 204279_at_A   | 0.00772003 |
| Hs.477370 | DAB1      | 42115   | 226020_s_at_B | 0.00774243 |
| Hs.132994 | CCDC69    | 549867  | 212886_at_A   | 0.00780983 |
| Hs.16695  | UBE1L     | 250883  | 1294_at_A     | 0.00783086 |
| Hs.591675 | IQCG      | 454327  | 221185_s_at_A | 0.00792782 |
| Hs.97726  | SPATC1    | 742702  | 241512_at_B   | 0.00799547 |
| Hs.471067 | LOC339483 | 772429  | 228593_at_B   | 0.00815189 |
| Hs.69328  | LY96      | 2306953 | 206584_at_A   | 0.00839214 |
| Hs.286261 | WDR55     | 279496  | 219809_at_A   | 0.00853272 |
| Hs.633147 | ---       | 365990  | 228700_at_B   | 0.008575   |
| Hs.593061 | ---       | 121459  | 236261_at_B   | 0.0085954  |
| Hs.407587 | GNRHR     | 50593   | 216341_s_at_A | 0.00862543 |
| Hs.105606 | FLJ20512  | 1476251 | 219219_at_A   | 0.00866914 |
| Hs.526494 | MGRN1     | 782147  | 212576_at_A   | 0.00874612 |
| Hs.632547 | COQ10B    | 626619  | 219397_at_A   | 0.00879677 |
| Hs.418367 | NMU       | 1703053 | 206023_at_A   | 0.00879699 |
| Hs.66163  | ---       | 2273418 | 215421_at_A   | 0.00883517 |
| Hs.546636 | LOC402665 | 758360  | 244694_at_B   | 0.00889536 |
| Hs.505004 | TCEA2     | 730149  | 203919_at_A   | 0.00907566 |
| Hs.164453 | HECW1     | 42811   | 237295_at_B   | 0.00914099 |
| Hs.439713 | ZNF154    | 825464  | 242170_at_B   | 0.00915617 |
| Hs.515104 | STXBP2    | 196650  | 209367_at_A   | 0.00920113 |
| Hs.146250 | ---       | 1880932 | 236821_at_B   | 0.00920682 |
| Hs.72964  | MKRN3     | 2169114 | 206585_at_A   | 0.00935199 |
| Hs.75615  | APOC2     | 809523  | 231561_s_at_B | 0.00939594 |
| Hs.89771  | GCKR      | 66534   | 206867_at_A   | 0.00952321 |
| Hs.3232   | CYLC2     | 1292142 | 207780_at_A   | 0.00956707 |
| Hs.262886 | INPP5D    | 825604  | 203332_s_at_A | 0.00970641 |
| Hs.278036 | LOC442512 | 1598759 | 244079_at_B   | 0.00972121 |
| Hs.590970 | AXL       | 49318   | 202686_s_at_A | 0.00973432 |
| Hs.91910  | UNQ5831   | 23323   | 236701_at_B   | 0.00981169 |

---
